# Supplementary material
Source: publisher site journal article supplement (https://www.dovepress.com/article/278891)
Supplement: Supplementary file 1 [file get_supplementary_file.php]

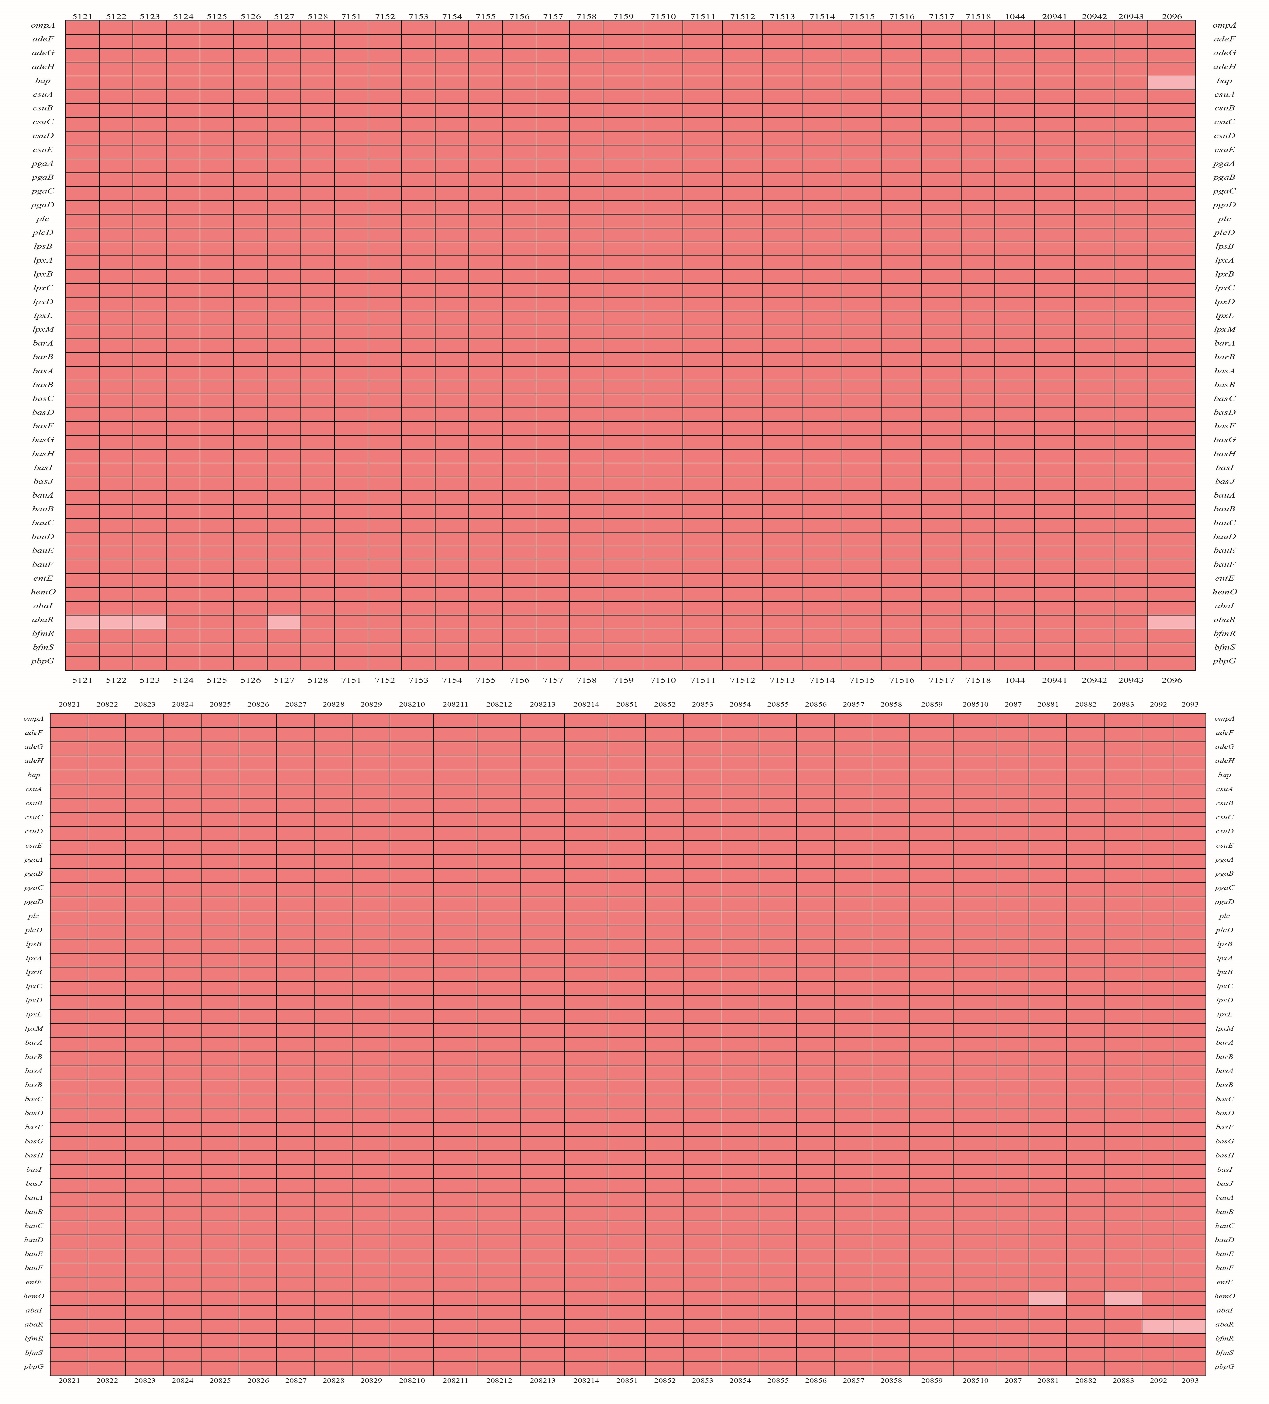


**Figure S1.** Virulence gene analysis of carbapenem-resistant Acinetobacter baumannii strains. Heatmaps were generated by aligning the draft genome sequence of each strain to the virulence gene database. The presence of virulence genes in a specific genome is represented by the dark red box and the absence of virulence genes is represented by the light red box. omp=outer membrane protein. ade=efflux pump/transport autoinducer genes. bap=biofilm-associated gene. csu=csu pili. pga=polysaccharide poly-N-acetylglucosamine. plc=phospholipase. bar, bas, bau, ent, hem=iron uptake gens. aba, bfm=regulation genes. pbpG=serum resistance gene.

**TABLE S1** Confidence levels of genomes identified as KL49 but without *gtr100*

| Assembly | Best match locus | Match confidence |
| --- | --- | --- |
| GCF_000582155 | KL49 | Good |
| GCF_000811805 | KL49 | Low |
| GCF_001276085 | KL49 | None |
| GCF_001420305 | KL49 | None |
| GCF_001649765 | KL49 | Low |
| GCF_001649795 | KL49 | None |
| GCF_001649805 | KL49 | None |
| GCF_001649835 | KL49 | None |
| GCF_001649875 | KL49 | None |
| GCF_001649895 | KL49 | None |
| GCF_001649955 | KL49 | None |
| GCF_002019035 | KL49 | None |
| GCF_003584375 | KL49 | None |
| GCF_003584455 | KL49 | None |
| GCF_003596175 | KL49 | None |
| GCF_900010325 | KL49 | Good |
